# Supplementary material for: New Agilent platform DNA microarrays for transcriptome analysis of Plasmodium falciparum and Plasmodium berghei for the malaria research community
Source: PubMed Central journal article supplement (PMC3411454; doi:10.1186/1475-2875-11-187), 2012-06-08
Supplement: 1475-2875-11-187-S4.pdf [file 1475-2875-11-187-S4.pdf]

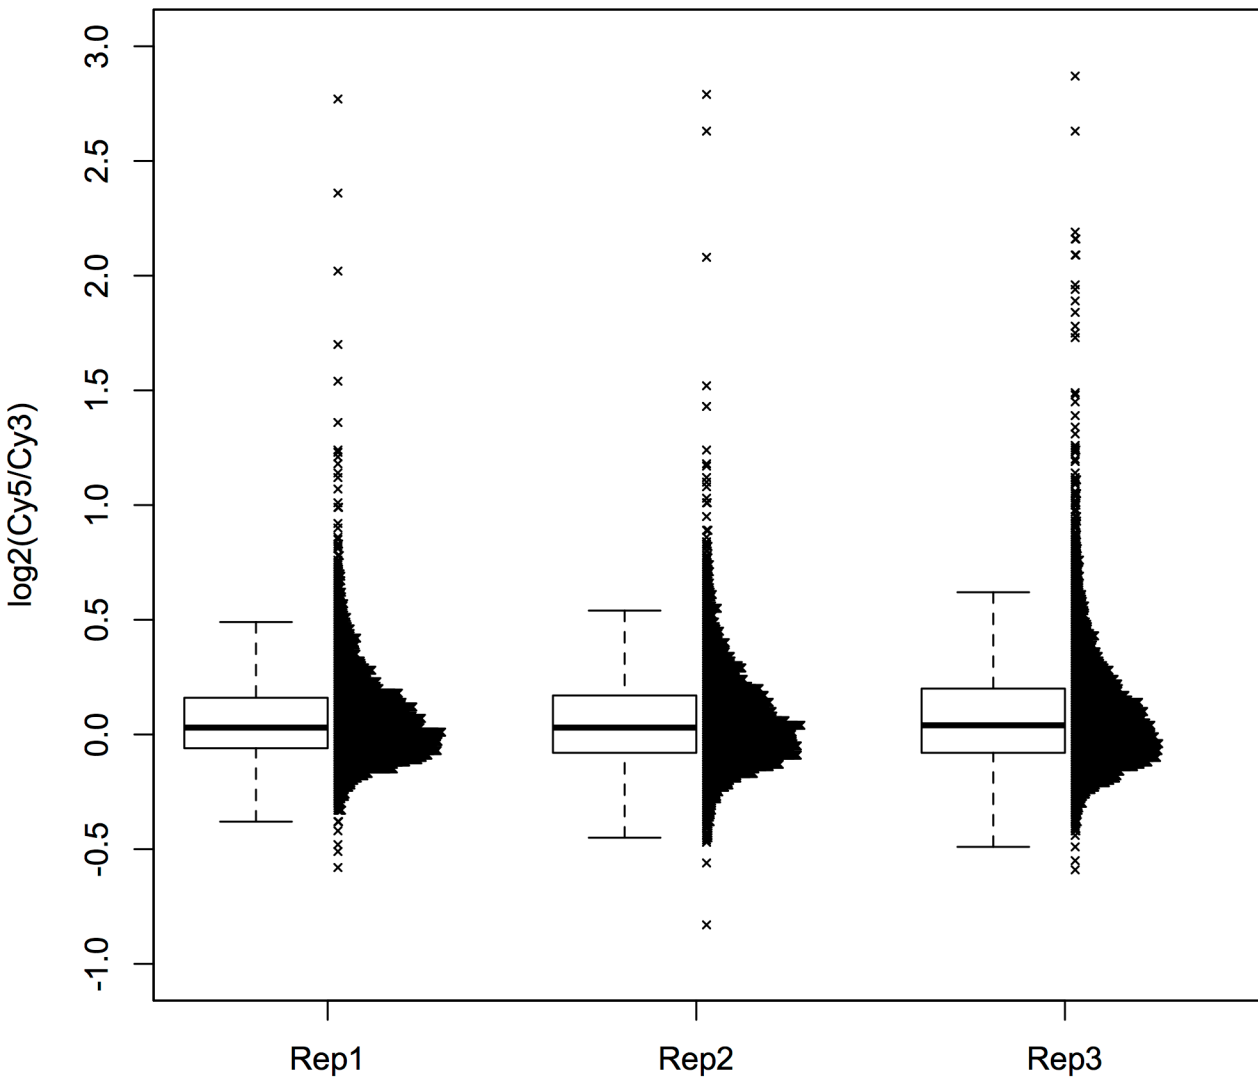

**Log2(Cy5/Cy3) Ratio by Gene**

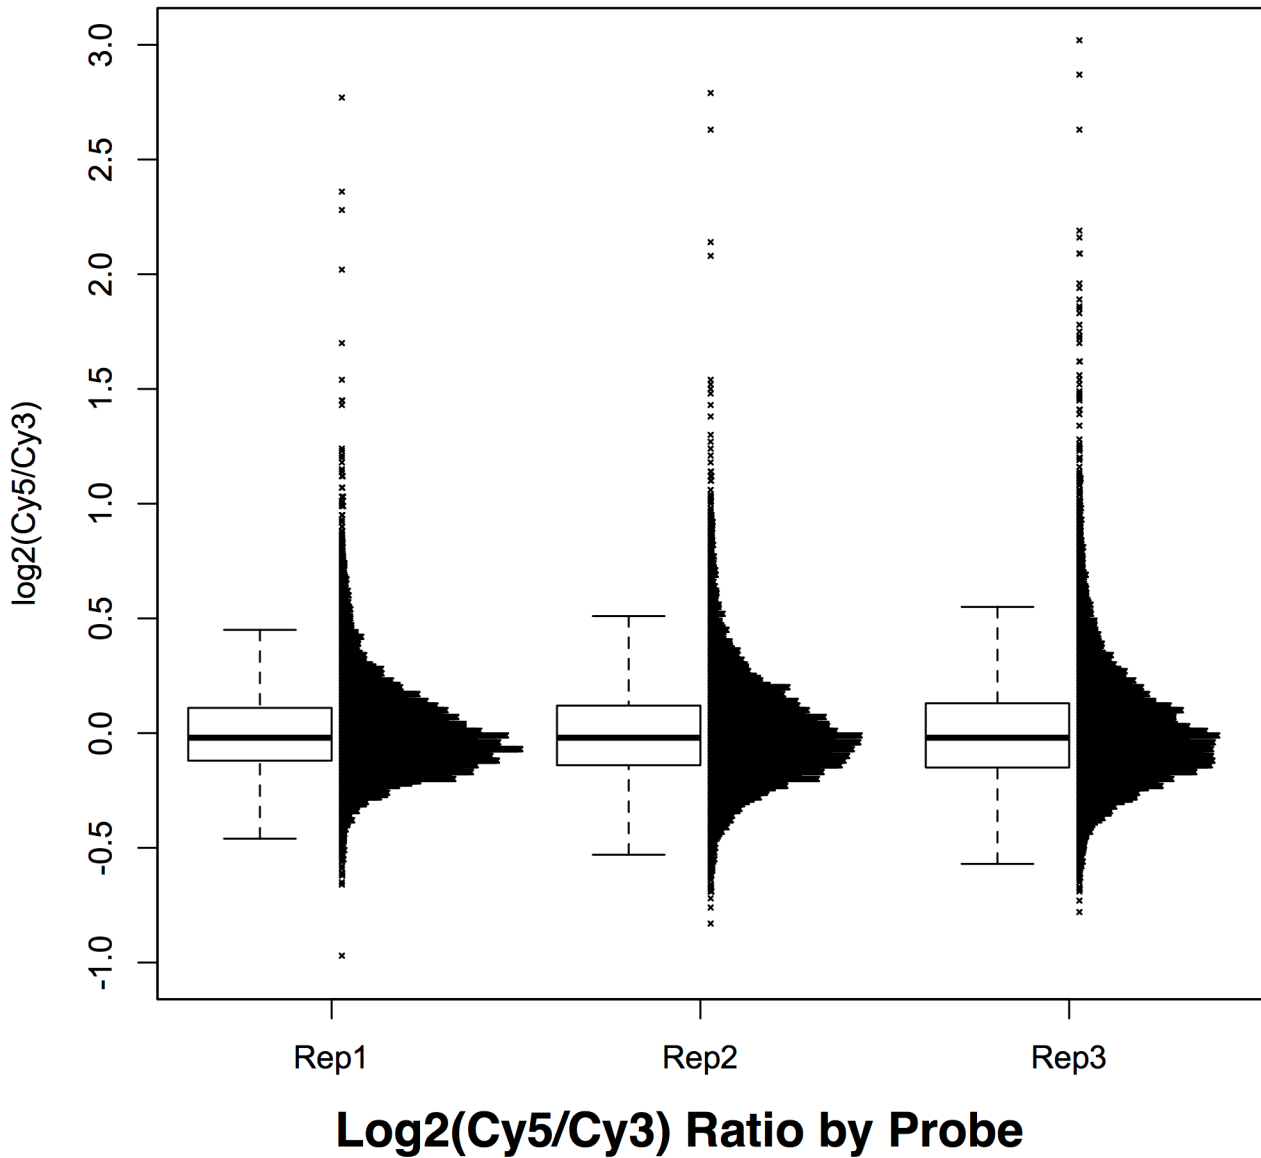

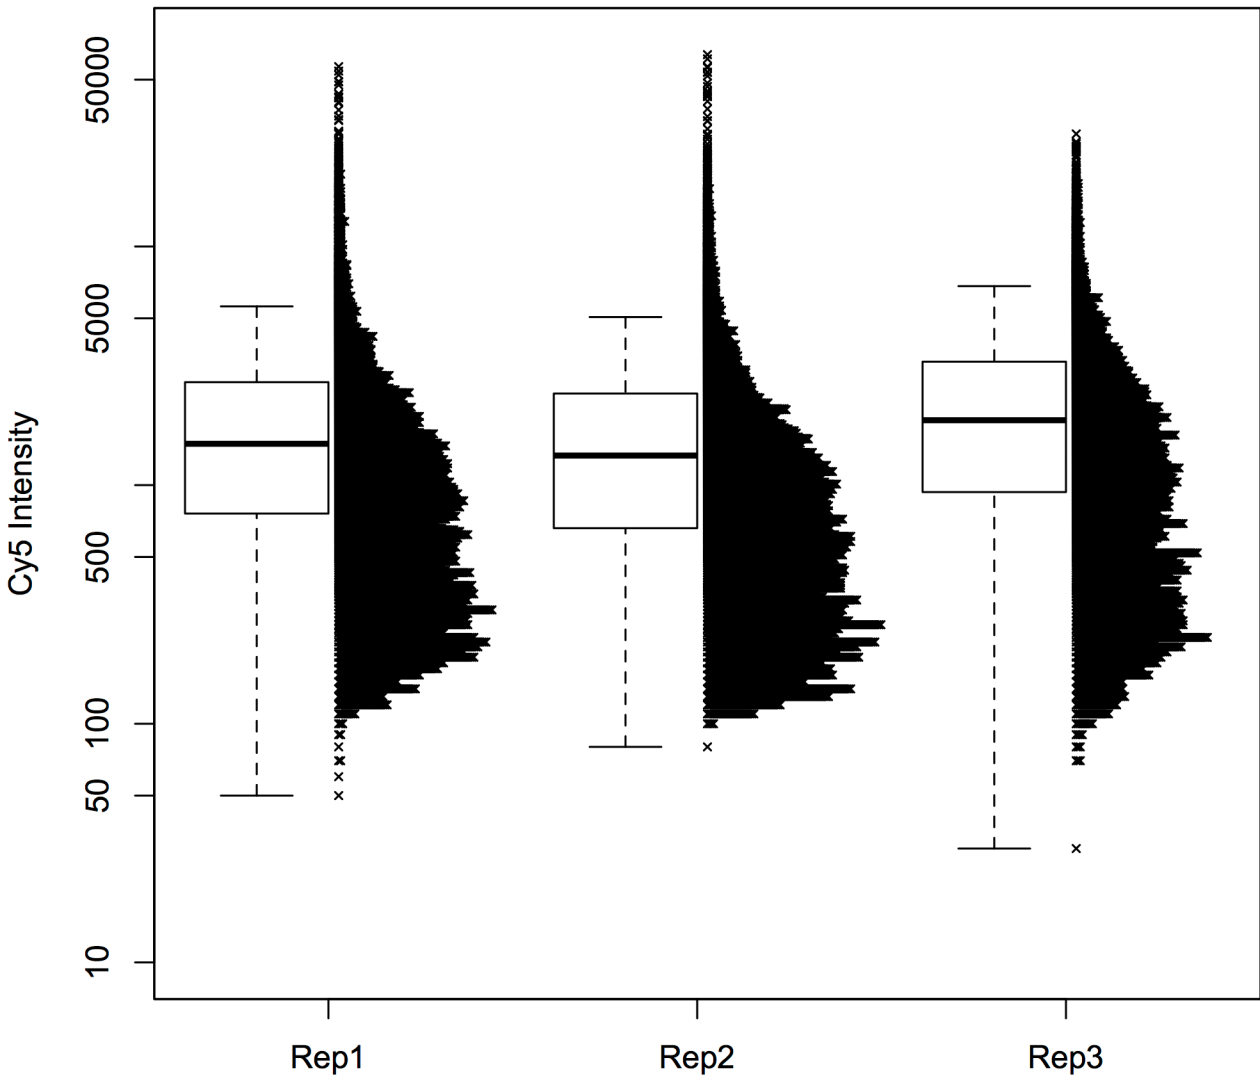

**Cy5 Intensity by Probe**

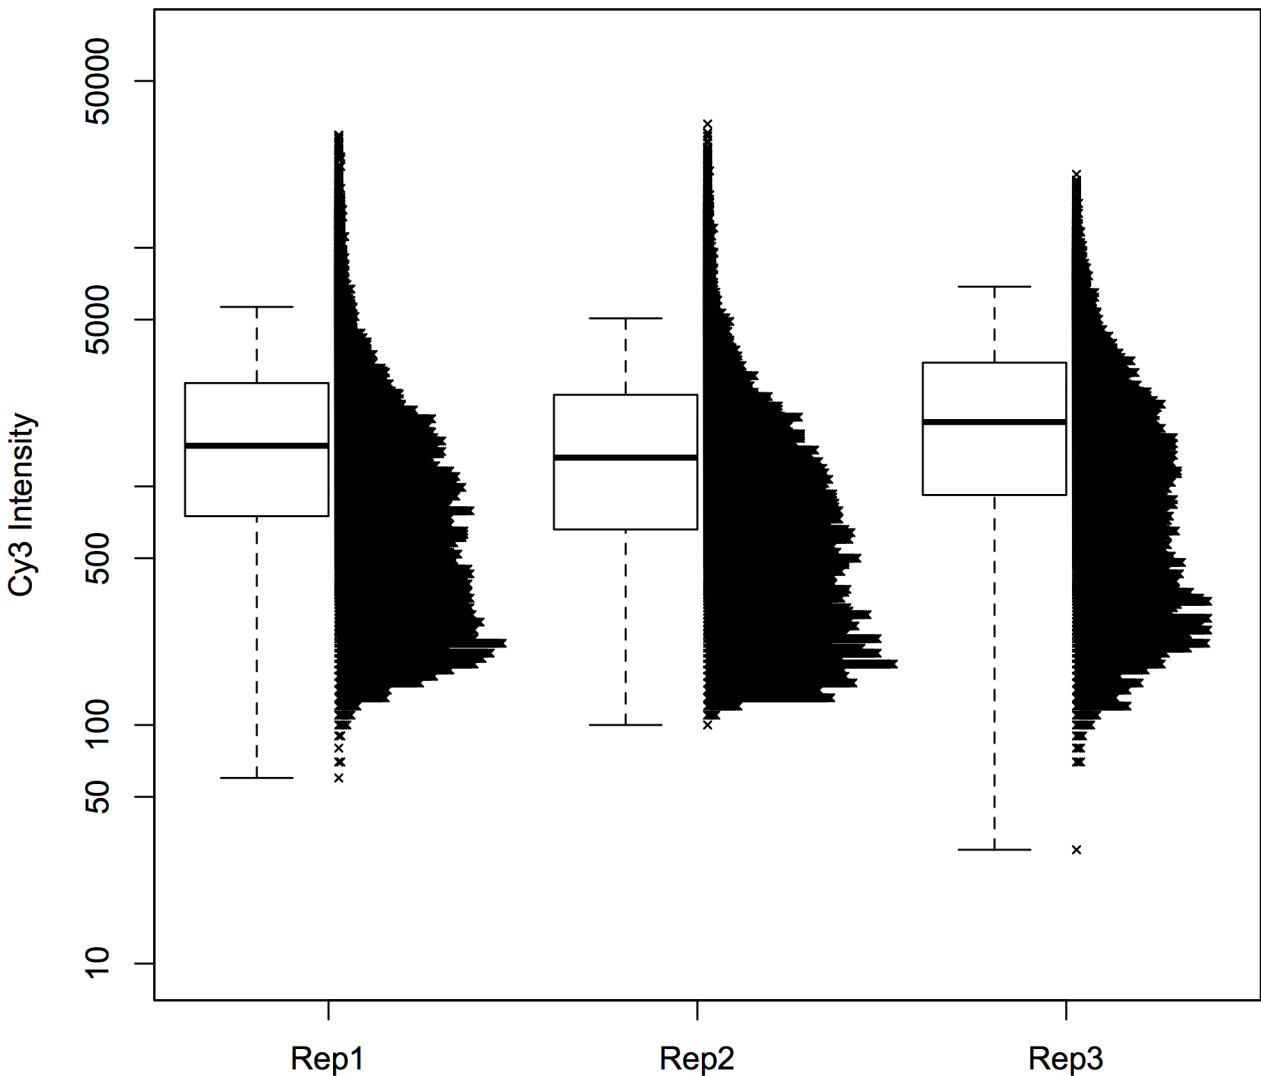

**Cy3 Intensity by Probe**

## Pearson's Coefficient of Correlation

| Comparison    | Gene<br>log <sub>2</sub> (Cy5/Cy3) | Probe<br>log <sub>2</sub> (Cy5/Cy3) | Probe<br>Cy5 Intensity | Probe<br>Cy3 Intensity |
|---------------|------------------------------------|-------------------------------------|------------------------|------------------------|
| Rep1 vs. Rep2 | 0.88                               | 0.82                                | 0.99                   | 0.99                   |
| Rep1 vs. Rep3 | 0.87                               | 0.85                                | 0.96                   | 0.93                   |
| Rep2 vs. Rep3 | 0.82                               | 0.80                                | 0.93                   | 0.90                   |

**Consistency of Technical Replicates.** Pearson's coefficient of correlation for comparisons of three replicates for at the gene- ( $\log_2$  ratio) and individual probe-level ( $\log_2$  ratio, Cy3 Intensity, Cy5 intensity).
