# Supplementary material for: New Agilent platform DNA microarrays for transcriptome analysis of Plasmodium falciparum and Plasmodium berghei for the malaria research community
Source: PubMed Central journal article supplement (PMC3411454; doi:10.1186/1475-2875-11-187), 2012-06-08
Supplement: 1475-2875-11-187-S6.pdf [file 1475-2875-11-187-S6.pdf]

**A**

| Amount hybridized                            | 1000ng | 500ng | 250ng | 100ng | 50ng  |
|----------------------------------------------|--------|-------|-------|-------|-------|
| Transcripts well above background            | 5254   | 5288  | 5219  | 5271  | 5199  |
| Percentage of unique transcripts represented | 91.3%  | 91.9% | 90.7% | 91.6% | 90.4% |

Average number of transcripts (n=3) with gene signal intensities called “Well above Background”.

**B**

|                                   |        | Pearson's r of mean Cy3 intensity |       |       |       |       |
|-----------------------------------|--------|-----------------------------------|-------|-------|-------|-------|
|                                   |        | 1000ng                            | 500ng | 250ng | 100ng | 50ng  |
| Pearson's r of mean Cy5 intensity | 1000ng |                                   | 0.977 | 0.974 | 0.964 | 0.825 |
|                                   | 500ng  | 0.964                             |       | 0.987 | 0.977 | 0.846 |
|                                   | 250ng  | 0.976                             | 0.974 |       | 0.997 | 0.903 |
|                                   | 100ng  | 0.973                             | 0.961 | 0.998 |       | 0.930 |
|                                   | 50ng   | 0.873                             | 0.822 | 0.916 | 0.936 |       |

Correlation of signal intensity across a self-hybridization dilution series . Pearson's coefficients of correlation between diminishing amounts of self-hybridized cDNA pools for Cy5 (bottom left) and Cy3 (top right) mean signal intensity (n=3) for 4810 genes.
